# Supplementary material for: RIG-I-Like Receptor-Mediated Recognition of Viral Genomic RNA of Severe Acute Respiratory Syndrome Coronavirus-2 and Viral Escape From the Host Innate Immune Responses
Source: PubMed Central journal article supplement (PMC8267574; doi:10.3389/fimmu.2021.700926), 2021-06-25
Supplement: Table_1.pdf [file Table_1.pdf]

Table 1. Primers for PCR or qPCR

| Construct / Oligo                   | 5'-3' Sequence                                                    |
|-------------------------------------|-------------------------------------------------------------------|
| IFN- $\beta$ qPCR primers           | Forward: tgggaggattctgcattacc<br>Reverse: cagcatctgctggtgaa       |
| IP-10 qPCR primers                  | Forward: tcacggttgagatcattgc<br>Reverse: ggccttcgattctggattcag    |
| CXCL5 qPCR primers                  | Forward: gctgtcatcctcattgctactg<br>Reverse: agcacttgccactgggtgtag |
| GAPDH qPCR primers                  | Forward: caatatgattccaccatgg<br>Reverse: aatgagccccagcttctcc      |
| SARS-CoV-2 qPCR primers             | Forward: gcctctctcgttctcatcac<br>Reverse: agcagcatcaccgccattg     |
| PR-8 (Influenza Virus) qPCR primers | Forward: tgaactgagaagcaggctactgg<br>Reverse: gaatgctgccataacgggtg |
| Sendai virus qPCR primers           | Forward: gttgttgagcaccttcgatac<br>Reverse: ggcctagtacgaacactgag   |

## nCoV-RNA synthesis primers

|             |                                                                                              |
|-------------|----------------------------------------------------------------------------------------------|
| 1-1000      | Forward: ttatcgaaattaatacgcactactatagggattaaaggtttataccttc<br>Reverse: agaacgtccgtgtaccaag   |
| 1001-2000   | Forward: ttatcgaaattaatacgcactactataggggaaaagagctatgaattgca<br>Reverse: tcagtgaatactgtgaaatt |
| 2001-3000   | Forward: ttatcgaaattaatacgcactactataggggactcattgatgctatgatg<br>Reverse: ccagactcatcaataagta  |
| 3001-4000   | Forward: ttatcgaaattaatacgcactactatagggtagttaaattggctcac<br>Reverse: ttctccagagtgtgtgaa      |
| 4001-5000   | Forward: ttatcgaaattaatacgcactactatagggactaagttcctcacagaaaa<br>Reverse: ggtaatgtgtctactgtt   |
| 5001-6000   | Forward: ttatcgaaattaatacgcactactatagggccaacgcaagttgtggac<br>Reverse: attggtgctctgtgaaata    |
| 6001-7000   | Forward: ttatcgaaattaatacgcactactataggggatctgtaccaaccaac<br>Reverse: gtagaftaaagaacctaggc    |
| 7001-8000   | Forward: ttatcgaaattaatacgcactactatagggcaaccgctgcttaggtgt<br>Reverse: cagacactaatgcctgatct   |
| 8001-9000   | Forward: ttatcgaaattaatacgcactactatagggatgttggtatagtcggaa<br>Reverse: gctgatgtgcaaagtcagt    |
| 9001-10000  | Forward: ttatcgaaattaatacgcactactataggggtgtgtttggctgctgaat<br>Reverse: acctgagtactgaagtcat   |
| 10001-11000 | Forward: ttatcgaaattaatacgcactactatagggctgatgttcttaccacc<br>Reverse: taccctgattgtcttttc      |
| 11001-12000 | Forward: ttatcgaaattaatacgcactactatagggcacaccactggtgttactc<br>Reverse: accatttttcaaaggctc    |
| 12001-13000 | Forward: ttatcgaaattaatacgcactactatagggctcactcttctgttttc<br>Reverse: actaccaagtaccatacctc    |
| 13001-14000 | Forward: ttatcgaaattaatacgcactactatagggtagctgccacagtactct<br>Reverse: tcgcatggcatcacagaatt   |
| 14001-15000 | Forward: ttatcgaaattaatacgcactactatagggatgctggtattgtgggtg<br>Reverse: tataatcgaaaagtgcactc   |
| 15001-16000 | Forward: ttatcgaaattaatacgcactactatagggcaaacgtaatgtcatcct<br>Reverse: atagctaaagacacgaaccg   |
| 16001-17000 | Forward: ttatcgaaattaatacgcactactataggggatgcttaccacttacta<br>Reverse: attgctagaaaactcatctg   |
| 17001-18000 | Forward: ttatcgaaattaatacgcactactataggggtgcaaatcaaaaagg<br>Reverse: ttgccacattctacgtgga      |

|             |                                                                                              |
|-------------|----------------------------------------------------------------------------------------------|
| 18001-19000 | Fowerd: ttatcgaaattaatacgactcactatagggctttacaagctgaaaatgta<br>Reverse: tcgtgaagaactgggaattt  |
| 19001-20000 | Fowerd: ttatcgaaattaatacgactcactatagggcattggaaccctaaagcta<br>Reverse: ggcatttctaaataagtcta   |
| 20001-21000 | Fowerd: ttatcgaaattaatacgactcactatagggcgtaatggtgttcttattac<br>Reverse: cccatttattagctgtatgt  |
| 21001-22000 | Fowerd: ttatcgaaattaatacgactcactatagggatctcattattagtgatag<br>Reverse: actcactttccatccaactt   |
| 22001-23000 | Fowerd: ttatcgaaattaatacgactcactatagggcagagtttattctagtgcg<br>Reverse: aagtaacaattaaaaccttc   |
| 23001-24000 | Fowerd: ttatcgaaattaatacgactcactatagggctcttaaatcatatggtt<br>Reverse: gaaaagtagatcttcaataa    |
| 24001-25000 | Fowerd: ttatcgaaattaatacgactcactatagggaaacaaagtgacacttgacaga<br>Reverse: taaaatattatctaactcc |
| 25001-26000 | Fowerd: ttatcgaaattaatacgactcactatagggagaatcatacatcaccagat<br>Reverse: ctggtaatagctgaagtga   |
| 26001-27000 | Fowerd: ttatcgaaattaatacgactcactatagggctgtactcaactcaattgag<br>Reverse: acagtgatttcttaggcag   |
| 27001-28000 | Fowerd: ttatcgaaattaatacgactcactataggggtctacatcacgaacgcttt<br>Reverse: ataccatttagaataagaagt |
| 28001-29000 | Fowerd: ttatcgaaattaatacgactcactatagggattagagtaggagctagaaa<br>Reverse: tcagcagcagatttcttagt  |
| 29001-29839 | Fowerd: ttatcgaaattaatacgactcactatagggggcttctaagaagcctcggc<br>Reverse: gtcatttctctaagaagcta  |
